# Supplementary material
Source: publisher figshare collection journal article supplement (https://asha.figshare.com/articles/dataset/_/5370883)
Supplement: Supplementary file 1 [file 1]

**Supplemental Material S11.** Percentage of respondents reporting use of self-management skills on the wppkww'y qtmuj qr 'hqmjy /w '\*VY H's wgnkppckg. Yes = the number who reported using the skill; N = the total number who answered the question. Percentages (%) are based on the number of individuals y ho answered each item.

| <u>Bay Pines VAHCS</u>       |      |    |     | Attended PTM Level 3 in: |    |     |      |    |     |      |    |     |      |     |      | Total Across Years |     |     |
|------------------------------|------|----|-----|--------------------------|----|-----|------|----|-----|------|----|-----|------|-----|------|--------------------|-----|-----|
| PTM Skill                    | 2010 |    |     | 2011                     |    |     | 2012 |    |     | 2013 |    |     | 2014 |     |      | Yes                | N   | %   |
|                              | Yes  | N  | %   | Yes                      | N  | %   | Yes  | N  | %   | Yes  | N  | %   | Yes  | N   | %    |                    |     |     |
| Using Sound                  | 49   | 58 | 84% | 39                       | 43 | 91% | 33   | 36 | 92% | 50   | 56 | 89% | 84   | 96  | 88%  | 255                | 289 | 88% |
| Practicing Relaxation        | 41   | 58 | 71% | 35                       | 43 | 81% | 32   | 36 | 89% | 51   | 56 | 91% | 84   | 96  | 88%  | 243                | 289 | 84% |
| Planning Pleasant Activities | 41   | 58 | 71% | 36                       | 43 | 84% | 32   | 36 | 89% | 47   | 56 | 84% | 80   | 96  | 83%  | 236                | 289 | 82% |
| Changing Thoughts & Feelings | 44   | 58 | 76% | 33                       | 43 | 77% | 31   | 36 | 86% | 43   | 56 | 77% | 70   | 95  | 74%  | 221                | 288 | 77% |
| <u>Boston VAMC</u>           |      |    |     | Attended PTM Level 3 in: |    |     |      |    |     |      |    |     |      |     |      | Total Across Years |     |     |
| PTM Skill                    | 2010 |    |     | 2011                     |    |     | 2012 |    |     | 2013 |    |     | 2014 |     |      | Yes                | N   | %   |
|                              | Yes  | N  | %   | Yes                      | N  | %   | Yes  | N  | %   | Yes  | N  | %   | Yes  | N   | %    |                    |     |     |
| Using Sound                  | 28   | 30 | 93% | 20                       | 25 | 80% | 22   | 28 | 79% | 18   | 23 | 78% | 32   | 32  | 100% | 120                | 138 | 87% |
| Practicing Relaxation        | 25   | 31 | 81% | 21                       | 25 | 84% | 25   | 28 | 89% | 16   | 23 | 70% | 29   | 32  | 91%  | 116                | 139 | 83% |
| Planning Pleasant Activities | 25   | 31 | 81% | 19                       | 25 | 76% | 26   | 28 | 93% | 14   | 21 | 67% | 24   | 32  | 75%  | 108                | 137 | 79% |
| Changing Thoughts & Feelings | 24   | 31 | 77% | 17                       | 25 | 68% | 24   | 28 | 86% | 17   | 23 | 74% | 23   | 32  | 72%  | 105                | 139 | 76% |
| <u>Total Across Sites</u>    |      |    |     | Attended PTM Level 3 in: |    |     |      |    |     |      |    |     |      |     |      | Total Across Years |     |     |
| PTM Skill                    | 2010 |    |     | 2011                     |    |     | 2012 |    |     | 2013 |    |     | 2014 |     |      | Yes                | N   | %   |
|                              | Yes  | N  | %   | Yes                      | N  | %   | Yes  | N  | %   | Yes  | N  | %   | Yes  | N   | %    |                    |     |     |
| Using Sound                  | 77   | 88 | 88% | 59                       | 68 | 87% | 55   | 64 | 86% | 68   | 79 | 86% | 116  | 128 | 91%  | 375                | 427 | 88% |
| Practicing Relaxation        | 66   | 89 | 74% | 56                       | 68 | 82% | 57   | 64 | 89% | 67   | 79 | 85% | 113  | 128 | 88%  | 359                | 428 | 84% |
| Planning Pleasant Activities | 66   | 89 | 74% | 55                       | 68 | 81% | 58   | 64 | 91% | 61   | 77 | 79% | 104  | 128 | 81%  | 344                | 426 | 81% |
| Changing Thoughts & Feelings | 68   | 89 | 76% | 50                       | 68 | 74% | 55   | 64 | 86% | 60   | 79 | 76% | 93   | 127 | 73%  | 326                | 427 | 76% |

Note. PTM = Progressive Tinnitus Management.
