# Supplementary material
Source: publisher figshare collection journal article supplement (https://asha.figshare.com/articles/dataset/_/5370883)
Supplement: Supplementary file 2 [file 1]

**Supplemental Material S10.** This table shows the number of respondents who would recommend the progressive tinnitus management (PTM) workshops to someone else with tinnitus. The first line in each section summarizes the responses of all participants. Below that, the responses are of those who were doing the same or worse on the item indicated.

| <u>Bay Pines</u>               |      |    | Attended PTM Level 3 in: |      |    |     |      |    |      |      |    |     |      |     | Total Across Years |     |     |     |
|--------------------------------|------|----|--------------------------|------|----|-----|------|----|------|------|----|-----|------|-----|--------------------|-----|-----|-----|
|                                | FY10 |    |                          | FY11 |    |     | FY12 |    |      | FY13 |    |     | FY14 |     |                    |     |     |     |
|                                | Rec  | N  | %                        | Rec  | N  | %   | Rec  | N  | %    | Rec  | N  | %   | Rec  | N   | %                  | Rec | N   | %   |
| All Participants:              | 50   | 58 | 86%                      | 39   | 43 | 91% | 34   | 36 | 94%  | 53   | 56 | 95% | 84   | 90  | 93%                | 260 | 283 | 92% |
| Of those the same or worse on: |      |    |                          |      |    |     |      |    |      |      |    |     |      |     |                    |     |     |     |
| Managing Reactions             | 14   | 21 | 67%                      | 6    | 8  | 75% | 5    | 6  | 83%  | 9    | 10 | 90% | 10   | 16  | 63%                | 44  | 61  | 72% |
| Coping                         | 20   | 28 | 71%                      | 10   | 12 | 83% | 8    | 9  | 89%  | 10   | 12 | 83% | 14   | 20  | 70%                | 62  | 81  | 77% |
| Quality of Life                | 20   | 26 | 77%                      | 13   | 15 | 87% | 9    | 10 | 90%  | 18   | 20 | 90% | 18   | 24  | 75%                | 78  | 95  | 82% |
| Bothersome tinnitus            | 26   | 34 | 76%                      | 14   | 16 | 88% | 10   | 11 | 91%  | 24   | 26 | 92% | 25   | 30  | 83%                | 99  | 117 | 85% |
| <u>Boston</u>                  |      |    | Attended PTM Level 3 in: |      |    |     |      |    |      |      |    |     |      |     | Total Across Years |     |     |     |
|                                | FY10 |    |                          | FY11 |    |     | FY12 |    |      | FY13 |    |     | FY14 |     |                    |     |     |     |
|                                | Rec  | N  | %                        | Rec  | N  | %   | Rec  | N  | %    | Rec  | N  | %   | Rec  | N   | %                  | Rec | N   | %   |
| All Participants:              | 29   | 31 | 94%                      | 23   | 25 | 92% | 28   | 28 | 100% | 21   | 23 | 91% | 30   | 32  | 94%                | 131 | 139 | 94% |
| Of those the same or worse on: |      |    |                          |      |    |     |      |    |      |      |    |     |      |     |                    |     |     |     |
| Managing Reactions             | 8    | 9  | 89%                      | 4    | 5  | 80% | 5    | 5  | 100% | 7    | 8  | 88% | 2    | 2   | 100%               | 26  | 29  | 90% |
| Coping                         | 10   | 11 | 91%                      | 8    | 9  | 89% | 7    | 7  | 100% | 5    | 7  | 71% | 7    | 8   | 88%                | 37  | 42  | 88% |
| Quality of Life                | 14   | 15 | 93%                      | 11   | 12 | 92% | 9    | 9  | 100% | 8    | 10 | 80% | 7    | 8   | 88%                | 49  | 54  | 91% |
| Bothersome Tinnitus            | 13   | 14 | 93%                      | 11   | 12 | 92% | 9    | 9  | 100% | 8    | 9  | 89% | 12   | 13  | 92%                | 53  | 57  | 93% |
| <u>Total Across Sites</u>      |      |    | Attended PTM Level 3 in: |      |    |     |      |    |      |      |    |     |      |     | Total Across Years |     |     |     |
|                                | FY10 |    |                          | FY11 |    |     | FY12 |    |      | FY13 |    |     | FY14 |     |                    |     |     |     |
|                                | Rec  | N  | %                        | Rec  | N  | %   | Rec  | N  | %    | Rec  | N  | %   | Rec  | N   | %                  | Rec | N   | %   |
| All Participants:              | 79   | 89 | 89%                      | 62   | 68 | 91% | 62   | 64 | 97%  | 74   | 79 | 94% | 114  | 122 | 93%                | 391 | 422 | 93% |

Note. Rec = the number who would recommend the workshops; N = the total number who answered the question; % = percentage of those who responded who would recommend the workshops.
