# Supplementary material
Source: publisher figshare collection journal article supplement (https://asha.figshare.com/articles/dataset/_/5370883)
Supplement: Supplementary file 3 [file 1]

**Supplemental Material S6.** Summary of responses regarding change in managing reactions to tinnitus since participating in progressive tinnitus management (PTM) Level 3 workshops.

| <i><b>Compared to before the PTM workshops, I now feel about managing reactions to tinnitus:</b></i> |                                 |            |             |            |             |            |             |            |             |            |                           |            |
|------------------------------------------------------------------------------------------------------|---------------------------------|------------|-------------|------------|-------------|------------|-------------|------------|-------------|------------|---------------------------|------------|
| <u><b>Bay Pines</b></u>                                                                              | <b>Attended PTM Level 3 in:</b> |            |             |            |             |            |             |            |             |            | <b>Total Across Years</b> |            |
|                                                                                                      | <b>2010</b>                     |            | <b>2011</b> |            | <b>2012</b> |            | <b>2013</b> |            | <b>2014</b> |            | <b>Years</b>              |            |
|                                                                                                      | <b>N</b>                        | <b>%</b>   | <b>N</b>    | <b>%</b>   | <b>N</b>    | <b>%</b>   | <b>N</b>    | <b>%</b>   | <b>N</b>    | <b>%</b>   | <b>N</b>                  | <b>%</b>   |
| A Lot More in Control                                                                                | 6                               | 12%        | 9           | 24%        | 6           | 19%        | 13          | 25%        | 23          | 26%        | 57                        | 22%        |
| Somewhat More in Control                                                                             | 10                              | 20%        | 12          | 32%        | 8           | 26%        | 15          | 29%        | 25          | 29%        | 70                        | 27%        |
| A Little More in Control                                                                             | 14                              | 27%        | 9           | 24%        | 11          | 35%        | 13          | 25%        | 23          | 26%        | 70                        | 27%        |
| <b>Subtotal: More in control</b>                                                                     | <b>30</b>                       | <b>59%</b> | <b>30</b>   | <b>79%</b> | <b>25</b>   | <b>81%</b> | <b>41</b>   | <b>80%</b> | <b>71</b>   | <b>82%</b> | <b>197</b>                | <b>76%</b> |
| The Same (no change)                                                                                 | 21                              | 41%        | 8           | 21%        | 6           | 19%        | 10          | 20%        | 16          | 18%        | 61                        | 24%        |
| <b>Total:</b>                                                                                        | <b>51</b>                       |            | <b>38</b>   |            | <b>31</b>   |            | <b>51</b>   |            | <b>87</b>   |            | <b>258</b>                |            |

  

| <u><b>Boston</b></u>             | <b>Attended PTM Level 3 in:</b> |            |             |            |             |            |             |            |             |            | <b>Total Across Years</b> |            |
|----------------------------------|---------------------------------|------------|-------------|------------|-------------|------------|-------------|------------|-------------|------------|---------------------------|------------|
|                                  | <b>2010</b>                     |            | <b>2011</b> |            | <b>2012</b> |            | <b>2013</b> |            | <b>2014</b> |            | <b>Years</b>              |            |
|                                  | <b>N</b>                        | <b>%</b>   | <b>N</b>    | <b>%</b>   | <b>N</b>    | <b>%</b>   | <b>N</b>    | <b>%</b>   | <b>N</b>    | <b>%</b>   | <b>N</b>                  | <b>%</b>   |
| A Lot More in Control            | 6                               | 21%        | 4           | 17%        | 4           | 15%        | 5           | 23%        | 9           | 32%        | 28                        | 22%        |
| Somewhat More in Control         | 7                               | 24%        | 7           | 30%        | 11          | 41%        | 2           | 9%         | 6           | 21%        | 33                        | 26%        |
| A Little More in Control         | 7                               | 24%        | 7           | 30%        | 7           | 26%        | 7           | 32%        | 11          | 39%        | 39                        | 30%        |
| <b>Subtotal: More in control</b> | <b>20</b>                       | <b>69%</b> | <b>18</b>   | <b>78%</b> | <b>22</b>   | <b>81%</b> | <b>14</b>   | <b>64%</b> | <b>26</b>   | <b>93%</b> | <b>100</b>                | <b>78%</b> |
| The Same (no change)             | 9                               | 31%        | 5           | 22%        | 5           | 19%        | 8           | 36%        | 2           | 7%         | 29                        | 22%        |
| <b>Total:</b>                    | <b>29</b>                       |            | <b>23</b>   |            | <b>27</b>   |            | <b>22</b>   |            | <b>28</b>   |            | <b>129</b>                |            |

  

| <u><b>Total Across Sites</b></u> | <b>Attended PTM Level 3 in:</b> |            |             |            |             |            |             |            |             |            | <b>Total Across Years</b> |            |
|----------------------------------|---------------------------------|------------|-------------|------------|-------------|------------|-------------|------------|-------------|------------|---------------------------|------------|
|                                  | <b>2010</b>                     |            | <b>2011</b> |            | <b>2012</b> |            | <b>2013</b> |            | <b>2014</b> |            | <b>Years</b>              |            |
|                                  | <b>N</b>                        | <b>%</b>   | <b>N</b>    | <b>%</b>   | <b>N</b>    | <b>%</b>   | <b>N</b>    | <b>%</b>   | <b>N</b>    | <b>%</b>   | <b>N</b>                  | <b>%</b>   |
| A Lot More in Control            | 12                              | 15%        | 13          | 21%        | 10          | 17%        | 18          | 25%        | 32          | 28%        | 85                        | 22%        |
| Somewhat More in Control         | 17                              | 21%        | 19          | 31%        | 19          | 33%        | 17          | 23%        | 31          | 27%        | 103                       | 27%        |
| A Little More in Control         | 21                              | 26%        | 16          | 26%        | 18          | 31%        | 20          | 27%        | 34          | 30%        | 109                       | 28%        |
| <b>Subtotal: More in control</b> | <b>50</b>                       | <b>63%</b> | <b>48</b>   | <b>79%</b> | <b>47</b>   | <b>81%</b> | <b>55</b>   | <b>75%</b> | <b>97</b>   | <b>84%</b> | <b>297</b>                | <b>77%</b> |
| The Same (no change)             | 30                              | 38%        | 13          | 21%        | 11          | 19%        | 18          | 25%        | 18          | 16%        | 90                        | 23%        |
| <b>Total:</b>                    | <b>80</b>                       |            | <b>61</b>   |            | <b>58</b>   |            | <b>73</b>   |            | <b>115</b>  |            | <b>387</b>                |            |
