# Supplementary material
Source: publisher figshare collection journal article supplement (https://asha.figshare.com/articles/dataset/_/5370883)
Supplement: Supplementary file 5 [file 1]

Supplemental Material S2.

**Self-Efficacy for Managing Reactions to Tinnitus (SMRT)**

**Please circle your answer.**

1. How confident are you that you can keep the fatigue caused by your tinnitus from interfering with the things you want to do?

|                         |   |   |   |   |   |   |   |   |                      |
|-------------------------|---|---|---|---|---|---|---|---|----------------------|
| 1                       | 2 | 3 | 4 | 5 | 6 | 7 | 8 | 9 | 10                   |
| Not at all<br>confident |   |   |   |   |   |   |   |   | Totally<br>confident |

2. How confident are you that you can keep the discomfort of your tinnitus from interfering with the things you want to do?

|                         |   |   |   |   |   |   |   |   |                      |
|-------------------------|---|---|---|---|---|---|---|---|----------------------|
| 1                       | 2 | 3 | 4 | 5 | 6 | 7 | 8 | 9 | 10                   |
| Not at all<br>confident |   |   |   |   |   |   |   |   | Totally<br>confident |

3. How confident are you that you can keep the emotional distress caused by your tinnitus from interfering with the things you want to do?

|                         |   |   |   |   |   |   |   |   |                      |
|-------------------------|---|---|---|---|---|---|---|---|----------------------|
| 1                       | 2 | 3 | 4 | 5 | 6 | 7 | 8 | 9 | 10                   |
| Not at all<br>confident |   |   |   |   |   |   |   |   | Totally<br>confident |

4. How confident are you that you can keep any other symptoms or health problems you have from interfering with the things you want to do?

|                         |   |   |   |   |   |   |   |   |                      |
|-------------------------|---|---|---|---|---|---|---|---|----------------------|
| 1                       | 2 | 3 | 4 | 5 | 6 | 7 | 8 | 9 | 10                   |
| Not at all<br>confident |   |   |   |   |   |   |   |   | Totally<br>confident |

5. How confident are you that you can do the different tasks and activities needed to manage your tinnitus so as to reduce your need to see a doctor?

|                         |   |   |   |   |   |   |   |   |                      |
|-------------------------|---|---|---|---|---|---|---|---|----------------------|
| 1                       | 2 | 3 | 4 | 5 | 6 | 7 | 8 | 9 | 10                   |
| Not at all<br>confident |   |   |   |   |   |   |   |   | Totally<br>confident |

6. How confident are you that you can do things other than taking medication to reduce how much your tinnitus affects your everyday life?

|                         |   |   |   |   |   |   |   |   |                      |
|-------------------------|---|---|---|---|---|---|---|---|----------------------|
| 1                       | 2 | 3 | 4 | 5 | 6 | 7 | 8 | 9 | 10                   |
| Not at all<br>confident |   |   |   |   |   |   |   |   | Totally<br>confident |

7. How confident are you that you can use sound to take your mind off your tinnitus?

|                         |   |   |   |   |   |   |   |   |                      |
|-------------------------|---|---|---|---|---|---|---|---|----------------------|
| 1                       | 2 | 3 | 4 | 5 | 6 | 7 | 8 | 9 | 10                   |
| Not at all<br>confident |   |   |   |   |   |   |   |   | Totally<br>confident |

8. How confident are you that you can find a way to relax when your tinnitus is bothering you?

|                         |   |   |   |   |   |   |   |   |                      |
|-------------------------|---|---|---|---|---|---|---|---|----------------------|
| 1                       | 2 | 3 | 4 | 5 | 6 | 7 | 8 | 9 | 10                   |
| Not at all<br>confident |   |   |   |   |   |   |   |   | Totally<br>confident |

9. How confident are you that you can reduce stress caused by tinnitus?

|                         |   |   |   |   |   |   |   |   |                      |
|-------------------------|---|---|---|---|---|---|---|---|----------------------|
| 1                       | 2 | 3 | 4 | 5 | 6 | 7 | 8 | 9 | 10                   |
| Not at all<br>confident |   |   |   |   |   |   |   |   | Totally<br>confident |

10. How confident are you that you can do things to take your mind off your tinnitus?

|                         |   |   |   |   |   |   |   |   |                      |
|-------------------------|---|---|---|---|---|---|---|---|----------------------|
| 1                       | 2 | 3 | 4 | 5 | 6 | 7 | 8 | 9 | 10                   |
| Not at all<br>confident |   |   |   |   |   |   |   |   | Totally<br>confident |

11. How confident are you that you can do things to keep your tinnitus from affecting your daily activities?

|                         |   |   |   |   |   |   |   |   |                      |
|-------------------------|---|---|---|---|---|---|---|---|----------------------|
| 1                       | 2 | 3 | 4 | 5 | 6 | 7 | 8 | 9 | 10                   |
| Not at all<br>confident |   |   |   |   |   |   |   |   | Totally<br>confident |

12. How confident are you that you can concentrate when your tinnitus is bothering you?

|                         |   |   |   |   |   |   |   |   |                      |
|-------------------------|---|---|---|---|---|---|---|---|----------------------|
| 1                       | 2 | 3 | 4 | 5 | 6 | 7 | 8 | 9 | 10                   |
| Not at all<br>confident |   |   |   |   |   |   |   |   | Totally<br>confident |

13. How confident are you that you can do things to keep your tinnitus from affecting your sleep?

|                         |   |   |   |   |   |   |   |   |                      |
|-------------------------|---|---|---|---|---|---|---|---|----------------------|
| 1                       | 2 | 3 | 4 | 5 | 6 | 7 | 8 | 9 | 10                   |
| Not at all<br>confident |   |   |   |   |   |   |   |   | Totally<br>confident |

14. How confident are you that you can do things to help yourself fall asleep or stay asleep, even when you hear your tinnitus?

|                         |   |   |   |   |   |   |   |   |                      |
|-------------------------|---|---|---|---|---|---|---|---|----------------------|
| 1                       | 2 | 3 | 4 | 5 | 6 | 7 | 8 | 9 | 10                   |
| Not at all<br>confident |   |   |   |   |   |   |   |   | Totally<br>confident |

***When your tinnitus is bothering you...***

15. ...how confident are you that you can use sound to make yourself feel better?

|                         |   |   |   |   |   |   |   |   |                      |
|-------------------------|---|---|---|---|---|---|---|---|----------------------|
| 1                       | 2 | 3 | 4 | 5 | 6 | 7 | 8 | 9 | 10                   |
| Not at all<br>confident |   |   |   |   |   |   |   |   | Totally<br>confident |

16. ...how confident are you that you can manage your reactions to tinnitus?

|                         |   |   |   |   |   |   |   |   |                      |
|-------------------------|---|---|---|---|---|---|---|---|----------------------|
| 1                       | 2 | 3 | 4 | 5 | 6 | 7 | 8 | 9 | 10                   |
| Not at all<br>confident |   |   |   |   |   |   |   |   | Totally<br>confident |

17. ...how confident are you that you can change the way you think about your tinnitus to make yourself feel better?

|                         |   |   |   |   |   |   |   |   |                      |
|-------------------------|---|---|---|---|---|---|---|---|----------------------|
| 1                       | 2 | 3 | 4 | 5 | 6 | 7 | 8 | 9 | 10                   |
| Not at all<br>confident |   |   |   |   |   |   |   |   | Totally<br>confident |
