# Supplementary material
Source: publisher figshare collection journal article supplement (https://asha.figshare.com/articles/dataset/_/5370883)
Supplement: Supplementary file 6 [file 1]

**Supplemental Material S9.** Summary of responses regarding change in how much bothered by tinnitus since participating in progressive tinnitus management (PTM) Level 3 workshops.

| <i>Compared to before the PTM workshops, my tinnitus now bothers me:</i> |                          |     |      |     |      |     |      |     |      |     |                    |     |
|--------------------------------------------------------------------------|--------------------------|-----|------|-----|------|-----|------|-----|------|-----|--------------------|-----|
| <u>Bay Pines</u>                                                         | Attended PTM Level 3 in: |     |      |     |      |     |      |     |      |     | Total Across Years |     |
|                                                                          | 2010                     |     | 2011 |     | 2012 |     | 2013 |     | 2014 |     | Total Across Years |     |
|                                                                          | N                        | %   | N    | %   | N    | %   | N    | %   | N    | %   | N                  | %   |
| A Lot Less                                                               | 3                        | 5%  | 6    | 14% | 3    | 9%  | 4    | 7%  | 12   | 14% | 28                 | 10% |
| Somewhat Less                                                            | 9                        | 16% | 8    | 19% | 9    | 27% | 12   | 21% | 19   | 22% | 57                 | 21% |
| A Little Less                                                            | 12                       | 21% | 13   | 30% | 10   | 30% | 14   | 25% | 26   | 30% | 75                 | 27% |
| Less subtotal:                                                           | 24                       | 41% | 27   | 63% | 22   | 67% | 30   | 54% | 57   | 66% | 160                | 58% |
| The Same                                                                 | 14                       | 24% | 9    | 21% | 5    | 15% | 16   | 29% | 21   | 24% | 65                 | 23% |
| A little more                                                            | 8                        | 14% | 2    | 5%  | 3    | 9%  | 5    | 9%  | 2    | 2%  | 20                 | 7%  |
| Somewhat more                                                            | 7                        | 12% | 2    | 5%  | 2    | 6%  | 2    | 4%  | 4    | 5%  | 17                 | 6%  |
| A lot more                                                               | 5                        | 9%  | 3    | 7%  | 1    | 3%  | 3    | 5%  | 3    | 3%  | 15                 | 5%  |
| Same or More subtotal:                                                   | 34                       | 59% | 16   | 37% | 11   | 33% | 26   | 46% | 30   | 34% | 117                | 42% |
| Total:                                                                   | 58                       |     | 43   |     | 33   |     | 56   |     | 87   |     | 277                |     |
| <u>Boston</u>                                                            | Attended PTM Level 3 in: |     |      |     |      |     |      |     |      |     | Total Across Years |     |
|                                                                          | 2010                     |     | 2011 |     | 2012 |     | 2013 |     | 2014 |     | Total Across Years |     |
|                                                                          | N                        | %   | N    | %   | N    | %   | N    | %   | N    | %   | N                  | %   |
| A Lot Less                                                               | 4                        | 13% | 1    | 4%  | 4    | 15% | 2    | 9%  | 2    | 6%  | 13                 | 10% |
| Somewhat Less                                                            | 3                        | 10% | 4    | 17% | 6    | 22% | 4    | 17% | 4    | 13% | 21                 | 16% |
| A Little Less                                                            | 9                        | 30% | 7    | 29% | 8    | 30% | 8    | 35% | 12   | 39% | 44                 | 33% |
| Less subtotal:                                                           | 16                       | 53% | 12   | 50% | 18   | 67% | 14   | 61% | 18   | 58% | 78                 | 58% |
| The Same                                                                 | 8                        | 27% | 6    | 25% | 6    | 22% | 3    | 13% | 13   | 42% | 36                 | 27% |
| A little more                                                            | 2                        | 7%  | 2    | 8%  | 1    | 4%  | 3    | 13% | 0    | 0%  | 8                  | 6%  |
| Somewhat more                                                            | 3                        | 10% | 1    | 4%  | 2    | 7%  | 2    | 9%  | 0    | 0%  | 8                  | 6%  |
| A lot more                                                               | 1                        | 3%  | 3    | 13% | 0    | 0%  | 1    | 4%  | 0    | 0%  | 5                  | 4%  |
| Same or More subtotal:                                                   | 14                       | 47% | 12   | 50% | 9    | 33% | 9    | 39% | 13   | 42% | 57                 | 42% |
| Total:                                                                   | 30                       |     | 24   |     | 27   |     | 23   |     | 31   |     | 135                |     |
| <u>Total Across Sites</u>                                                | Attended PTM Level 3 in: |     |      |     |      |     |      |     |      |     | Total Across Years |     |
|                                                                          | 2010                     |     | 2011 |     | 2012 |     | 2013 |     | 2014 |     | Total Across Years |     |
|                                                                          | N                        | %   | N    | %   | N    | %   | N    | %   | N    | %   | N                  | %   |
| A Lot Less                                                               | 7                        | 8%  | 7    | 10% | 7    | 12% | 6    | 8%  | 14   | 12% | 41                 | 10% |
| Somewhat Less                                                            | 12                       | 14% | 12   | 18% | 15   | 25% | 16   | 20% | 23   | 19% | 78                 | 19% |
| A Little Less                                                            | 21                       | 24% | 20   | 30% | 18   | 30% | 22   | 28% | 38   | 32% | 119                | 29% |
| Less subtotal:                                                           | 40                       | 45% | 39   | 58% | 40   | 67% | 44   | 56% | 75   | 64% | 238                | 58% |
| The Same                                                                 | 22                       | 25% | 15   | 22% | 11   | 18% | 19   | 24% | 34   | 29% | 101                | 25% |
| A little more                                                            | 10                       | 11% | 4    | 6%  | 4    | 7%  | 8    | 10% | 2    | 2%  | 28                 | 7%  |
| Somewhat more                                                            | 10                       | 11% | 3    | 4%  | 4    | 7%  | 4    | 5%  | 4    | 3%  | 25                 | 6%  |
| A lot more                                                               | 6                        | 7%  | 6    | 9%  | 1    | 2%  | 4    | 5%  | 3    | 3%  | 20                 | 5%  |
| Same or More subtotal:                                                   | 48                       | 55% | 28   | 42% | 20   | 33% | 35   | 44% | 43   | 36% | 174                | 42% |
| Total:                                                                   | 88                       |     | 67   |     | 60   |     | 79   |     | 118  |     | 412                |     |
