# Supplementary material
Source: publisher figshare collection journal article supplement (https://asha.figshare.com/articles/dataset/_/5370883)
Supplement: Supplementary file 7 [file 1]

**Supplemental Material S7.** Summary of responses regarding change in ability to cope with tinnitus since participating in progressive tinnitus management (PTM) Level 3 workshops.

| <i>Compared to before the PTM workshops, my ability to cope with tinnitus is now:</i> |                          |            |           |            |           |            |           |            |            |            |                    |            |
|---------------------------------------------------------------------------------------|--------------------------|------------|-----------|------------|-----------|------------|-----------|------------|------------|------------|--------------------|------------|
| <u><i>Bay Pines</i></u>                                                               | Attended PTM Level 3 in: |            |           |            |           |            |           |            |            |            | Total Across Years |            |
|                                                                                       | 2010                     |            | 2011      |            | 2012      |            | 2013      |            | 2014       |            | Total Across Years |            |
|                                                                                       | N                        | %          | N         | %          | N         | %          | N         | %          | N          | %          | N                  | %          |
| A Lot Better                                                                          | 5                        | 9%         | 9         | 20%        | 5         | 14%        | 13        | 23%        | 18         | 20%        | 50                 | 18%        |
| Somewhat Better                                                                       | 8                        | 14%        | 12        | 27%        | 13        | 37%        | 14        | 25%        | 27         | 31%        | 74                 | 26%        |
| A Little Better                                                                       | 17                       | 29%        | 11        | 25%        | 8         | 23%        | 17        | 30%        | 23         | 26%        | 76                 | 27%        |
| <b>Better subtotal:</b>                                                               | <b>30</b>                | <b>52%</b> | <b>32</b> | <b>73%</b> | <b>26</b> | <b>74%</b> | <b>44</b> | <b>79%</b> | <b>68</b>  | <b>77%</b> | <b>200</b>         | <b>71%</b> |
| The Same                                                                              | 19                       | 33%        | 8         | 18%        | 6         | 17%        | 7         | 13%        | 14         | 16%        | 54                 | 19%        |
| A little worse                                                                        | 5                        | 9%         | 2         | 5%         | 2         | 6%         | 3         | 5%         | 2          | 2%         | 14                 | 5%         |
| Somewhat worse                                                                        | 3                        | 5%         | 1         | 2%         | 1         | 3%         | 1         | 2%         | 3          | 3%         | 9                  | 3%         |
| A lot worse                                                                           | 1                        | 2%         | 1         | 2%         | 0         | 0%         | 1         | 2%         | 1          | 1%         | 4                  | 1%         |
| <b>Same or Worse subtotal:</b>                                                        | <b>28</b>                | <b>48%</b> | <b>12</b> | <b>27%</b> | <b>9</b>  | <b>26%</b> | <b>12</b> | <b>21%</b> | <b>20</b>  | <b>23%</b> | <b>81</b>          | <b>29%</b> |
| <b>Total:</b>                                                                         | <b>58</b>                |            | <b>44</b> |            | <b>35</b> |            | <b>56</b> |            | <b>88</b>  |            | <b>281</b>         |            |
| <u><i>Boston</i></u>                                                                  | Attended PTM Level 3 in: |            |           |            |           |            |           |            |            |            | Total Across Years |            |
|                                                                                       | 2010                     |            | 2011      |            | 2012      |            | 2013      |            | 2014       |            | Total Across Years |            |
|                                                                                       | N                        | %          | N         | %          | N         | %          | N         | %          | N          | %          | N                  | %          |
| A Lot Better                                                                          | 6                        | 20%        | 3         | 13%        | 4         | 14%        | 4         | 17%        | 6          | 19%        | 23                 | 17%        |
| Somewhat Better                                                                       | 5                        | 17%        | 5         | 21%        | 13        | 46%        | 5         | 22%        | 9          | 28%        | 37                 | 27%        |
| A Little Better                                                                       | 8                        | 27%        | 7         | 29%        | 4         | 14%        | 7         | 30%        | 9          | 28%        | 35                 | 26%        |
| <b>Better subtotal:</b>                                                               | <b>19</b>                | <b>63%</b> | <b>15</b> | <b>63%</b> | <b>21</b> | <b>75%</b> | <b>16</b> | <b>70%</b> | <b>24</b>  | <b>75%</b> | <b>95</b>          | <b>69%</b> |
| The Same                                                                              | 7                        | 23%        | 7         | 29%        | 5         | 18%        | 4         | 17%        | 6          | 19%        | 29                 | 21%        |
| A little worse                                                                        | 2                        | 7%         | 0         | 0%         | 2         | 7%         | 1         | 4%         | 0          | 0%         | 5                  | 4%         |
| Somewhat worse                                                                        | 2                        | 7%         | 1         | 4%         | 0         | 0%         | 1         | 4%         | 2          | 6%         | 6                  | 4%         |
| A lot worse                                                                           | 0                        | 0%         | 1         | 4%         | 0         | 0%         | 1         | 4%         | 0          | 0%         | 2                  | 1%         |
| <b>Same or Worse subtotal:</b>                                                        | <b>11</b>                | <b>37%</b> | <b>9</b>  | <b>38%</b> | <b>7</b>  | <b>25%</b> | <b>7</b>  | <b>30%</b> | <b>8</b>   | <b>25%</b> | <b>42</b>          | <b>31%</b> |
| <b>Total:</b>                                                                         | <b>30</b>                |            | <b>24</b> |            | <b>28</b> |            | <b>23</b> |            | <b>32</b>  |            | <b>137</b>         |            |
| <u><i>Total Across Sites</i></u>                                                      | Attended PTM Level 3 in: |            |           |            |           |            |           |            |            |            | Total Across Years |            |
|                                                                                       | 2010                     |            | 2011      |            | 2012      |            | 2013      |            | 2014       |            | Total Across Years |            |
|                                                                                       | N                        | %          | N         | %          | N         | %          | N         | %          | N          | %          | N                  | %          |
| A Lot Better                                                                          | 11                       | 13%        | 12        | 18%        | 9         | 14%        | 17        | 22%        | 24         | 20%        | 73                 | 17%        |
| Somewhat Better                                                                       | 13                       | 15%        | 17        | 25%        | 26        | 41%        | 19        | 24%        | 36         | 30%        | 111                | 27%        |
| A Little Better                                                                       | 25                       | 28%        | 18        | 26%        | 12        | 19%        | 24        | 30%        | 32         | 27%        | 111                | 27%        |
| <b>Better subtotal:</b>                                                               | <b>49</b>                | <b>56%</b> | <b>47</b> | <b>69%</b> | <b>47</b> | <b>75%</b> | <b>60</b> | <b>76%</b> | <b>92</b>  | <b>77%</b> | <b>295</b>         | <b>71%</b> |
| The Same                                                                              | 26                       | 30%        | 15        | 22%        | 11        | 17%        | 11        | 14%        | 20         | 17%        | 83                 | 20%        |
| A little worse                                                                        | 7                        | 8%         | 2         | 3%         | 4         | 6%         | 4         | 5%         | 2          | 2%         | 19                 | 5%         |
| Somewhat worse                                                                        | 5                        | 6%         | 2         | 3%         | 1         | 2%         | 2         | 3%         | 5          | 4%         | 15                 | 4%         |
| A lot worse                                                                           | 1                        | 1%         | 2         | 3%         | 0         | 0%         | 2         | 3%         | 1          | 1%         | 6                  | 1%         |
| <b>Same or Worse subtotal:</b>                                                        | <b>39</b>                | <b>44%</b> | <b>21</b> | <b>31%</b> | <b>16</b> | <b>25%</b> | <b>19</b> | <b>24%</b> | <b>28</b>  | <b>23%</b> | <b>123</b>         | <b>29%</b> |
| <b>Total:</b>                                                                         | <b>88</b>                |            | <b>68</b> |            | <b>63</b> |            | <b>79</b> |            | <b>120</b> |            | <b>418</b>         |            |
