# Supplementary material
Source: publisher figshare collection journal article supplement (https://asha.figshare.com/articles/dataset/_/5370883)
Supplement: Supplementary file 8 [file 1]

**Supplemental Material S4.** Return rate of workshop questionnaires, by site, for participants in the workshop prior to the workshop and after the workshop in years 2010–2014.

| Attended PTM<br>Level 3 in: | <u>Bay Pines VAHCS</u> |          |      | <u>Boston VAMC</u> |          |      | <u>Total Across Sites</u> |          |      |
|-----------------------------|------------------------|----------|------|--------------------|----------|------|---------------------------|----------|------|
|                             | Sent                   | Returned | Rate | Sent               | Returned | Rate | Sent                      | Returned | Rate |
| 2010                        | 125                    | 58       | 46%  | 58                 | 31       | 53%  | 183                       | 89       | 49%  |
| 2011                        | 102                    | 43       | 42%  | 50                 | 25       | 50%  | 152                       | 68       | 45%  |
| 2012                        | 120                    | 36       | 30%  | 68                 | 28       | 41%  | 188                       | 64       | 34%  |
| 2013                        | 119                    | 56       | 47%  | 68                 | 23       | 34%  | 187                       | 79       | 42%  |
| 2014                        | 163                    | 96       | 59%  | 78                 | 32       | 41%  | 241                       | 128      | 53%  |
| <b>Total Across Years</b>   | 629                    | 289      | 46%  | 322                | 139      | 43%  | 951                       | 428      | 45%  |
