# Supplementary material
Source: publisher figshare collection journal article supplement (https://asha.figshare.com/articles/dataset/_/5370883)
Supplement: Supplementary file 10 [file 1]

**Supplemental Material S5.** Patients' report of number of self-management skills they are using on the tinnitus workshop follow-up (TWF) questionnaire. For four self-management skills, patients are asked whether or not they are using those skills. For each respondent, the number of "yes" responses is totaled.

| <b><u>Bay Pines</u></b>          |  | <b>Attended PTM Level 3 in:</b> |          |             |          |             |          |             |          |             |          | <b>Total Across Years</b> |          |
|----------------------------------|--|---------------------------------|----------|-------------|----------|-------------|----------|-------------|----------|-------------|----------|---------------------------|----------|
|                                  |  | <b>2010</b>                     |          | <b>2011</b> |          | <b>2012</b> |          | <b>2013</b> |          | <b>2014</b> |          |                           |          |
| <b>Number of Skills Used</b>     |  | <b>N</b>                        | <b>%</b> | <b>N</b>    | <b>%</b> | <b>N</b>    | <b>%</b> | <b>N</b>    | <b>%</b> | <b>N</b>    | <b>%</b> | <b>N</b>                  | <b>%</b> |
| 4                                |  | 33                              | 57%      | 30          | 70%      | 25          | 69%      | 38          | 68%      | 58          | 60%      | 184                       | 64%      |
| 3                                |  | 7                               | 12%      | 3           | 7%       | 7           | 19%      | 10          | 18%      | 20          | 21%      | 47                        | 16%      |
| 2                                |  | 7                               | 12%      | 6           | 14%      | 2           | 6%       | 4           | 7%       | 10          | 10%      | 29                        | 10%      |
| 1                                |  | 7                               | 12%      | 2           | 5%       | 2           | 6%       | 1           | 2%       | 6           | 6%       | 18                        | 6%       |
| 0                                |  | 4                               | 7%       | 2           | 5%       | 0           | 0%       | 3           | 5%       | 2           | 2%       | 11                        | 4%       |
| <b>Total</b>                     |  | <b>58</b>                       |          | <b>43</b>   |          | <b>36</b>   |          | <b>56</b>   |          | <b>96</b>   |          | <b>289</b>                |          |
| <b><u>Boston</u></b>             |  | <b>Attended PTM Level 3 in:</b> |          |             |          |             |          |             |          |             |          | <b>Total Across Years</b> |          |
|                                  |  | <b>2010</b>                     |          | <b>2011</b> |          | <b>2012</b> |          | <b>2013</b> |          | <b>2014</b> |          |                           |          |
| <b>Number of Skills Used</b>     |  | <b>N</b>                        | <b>%</b> | <b>N</b>    | <b>%</b> | <b>N</b>    | <b>%</b> | <b>N</b>    | <b>%</b> | <b>N</b>    | <b>%</b> | <b>N</b>                  | <b>%</b> |
| 4                                |  | 20                              | 65%      | 14          | 56%      | 18          | 64%      | 11          | 48%      | 18          | 56%      | 81                        | 58%      |
| 3                                |  | 3                               | 10%      | 5           | 20%      | 8           | 29%      | 4           | 17%      | 10          | 31%      | 30                        | 22%      |
| 2                                |  | 6                               | 19%      | 4           | 16%      | 0           | 0%       | 3           | 13%      | 2           | 6%       | 15                        | 11%      |
| 1                                |  | 1                               | 3%       | 0           | 0%       | 2           | 7%       | 2           | 9%       | 2           | 6%       | 7                         | 5%       |
| 0                                |  | 1                               | 3%       | 2           | 8%       | 0           | 0%       | 3           | 13%      | 0           | 0%       | 6                         | 4%       |
| <b>Total</b>                     |  | <b>31</b>                       |          | <b>25</b>   |          | <b>28</b>   |          | <b>23</b>   |          | <b>32</b>   |          | <b>139</b>                |          |
| <b><u>Total Across Sites</u></b> |  | <b>Attended PTM Level 3 in:</b> |          |             |          |             |          |             |          |             |          | <b>Total Across Years</b> |          |
|                                  |  | <b>2010</b>                     |          | <b>2011</b> |          | <b>2012</b> |          | <b>2013</b> |          | <b>2014</b> |          |                           |          |
| <b>Number of Skills Used</b>     |  | <b>N</b>                        | <b>%</b> | <b>N</b>    | <b>%</b> | <b>N</b>    | <b>%</b> | <b>N</b>    | <b>%</b> | <b>N</b>    | <b>%</b> | <b>N</b>                  | <b>%</b> |
| 4                                |  | 53                              | 60%      | 44          | 65%      | 43          | 67%      | 49          | 62%      | 76          | 59%      | 265                       | 62%      |
| 3                                |  | 10                              | 11%      | 8           | 12%      | 15          | 23%      | 14          | 18%      | 30          | 23%      | 77                        | 18%      |
| 2                                |  | 13                              | 15%      | 10          | 15%      | 2           | 3%       | 7           | 9%       | 12          | 9%       | 44                        | 10%      |
| 1                                |  | 8                               | 9%       | 2           | 3%       | 4           | 6%       | 3           | 4%       | 8           | 6%       | 25                        | 6%       |
| 0                                |  | 5                               | 6%       | 4           | 6%       | 0           | 0%       | 6           | 8%       | 2           | 2%       | 17                        | 4%       |
| <b>Total</b>                     |  | <b>89</b>                       |          | <b>68</b>   |          | <b>64</b>   |          | <b>79</b>   |          | <b>128</b>  |          | <b>428</b>                |          |

Note. PTM = progressive tinnitus management.
