# Supplementary material
Source: publisher figshare collection journal article supplement (https://asha.figshare.com/articles/dataset/_/5370883)
Supplement: Supplementary file 11 [file 1]

**Supplemental Material S8.** Summary of responses regarding change in quality of life since participating in progressive tinnitus management (PTM) Level 3 workshops.

| <i>Compared to before the PTM workshops, my quality of life is now:</i> |                          |            |           |            |           |            |           |            |            |            |                    |            |
|-------------------------------------------------------------------------|--------------------------|------------|-----------|------------|-----------|------------|-----------|------------|------------|------------|--------------------|------------|
| <u><i>Bay Pines</i></u>                                                 | Attended PTM Level 3 in: |            |           |            |           |            |           |            |            |            | Total Across Years |            |
|                                                                         | 2010                     |            | 2011      |            | 2012      |            | 2013      |            | 2014       |            | Total Across Years |            |
|                                                                         | N                        | %          | N         | %          | N         | %          | N         | %          | N          | %          | N                  | %          |
| A Lot Better                                                            | 7                        | 12%        | 7         | 17%        | 5         | 15%        | 7         | 13%        | 10         | 11%        | 36                 | 13%        |
| Somewhat Better                                                         | 9                        | 16%        | 8         | 19%        | 12        | 35%        | 14        | 25%        | 25         | 28%        | 68                 | 24%        |
| A Little Better                                                         | 16                       | 28%        | 12        | 29%        | 7         | 21%        | 15        | 27%        | 30         | 34%        | 80                 | 29%        |
| <b>Better subtotal:</b>                                                 | <b>32</b>                | <b>55%</b> | <b>27</b> | <b>64%</b> | <b>24</b> | <b>71%</b> | <b>36</b> | <b>64%</b> | <b>65</b>  | <b>73%</b> | <b>184</b>         | <b>66%</b> |
| The Same                                                                | 18                       | 31%        | 11        | 26%        | 8         | 24%        | 18        | 32%        | 17         | 19%        | 72                 | 26%        |
| A little worse                                                          | 3                        | 5%         | 1         | 2%         | 0         | 0%         | 1         | 2%         | 2          | 2%         | 7                  | 3%         |
| Somewhat worse                                                          | 4                        | 7%         | 0         | 0%         | 2         | 6%         | 0         | 0%         | 3          | 3%         | 9                  | 3%         |
| A lot worse                                                             | 1                        | 2%         | 3         | 7%         | 0         | 0%         | 1         | 2%         | 2          | 2%         | 7                  | 3%         |
| <b>Same or Worse subtotal:</b>                                          | <b>26</b>                | <b>45%</b> | <b>15</b> | <b>36%</b> | <b>10</b> | <b>29%</b> | <b>20</b> | <b>36%</b> | <b>24</b>  | <b>27%</b> | <b>95</b>          | <b>34%</b> |
| <b>Total:</b>                                                           | <b>58</b>                |            | <b>42</b> |            | <b>34</b> |            | <b>56</b> |            | <b>89</b>  |            | <b>279</b>         |            |
| <u><i>Boston</i></u>                                                    | Attended PTM Level 3 in: |            |           |            |           |            |           |            |            |            | Total Across Years |            |
|                                                                         | 2010                     |            | 2011      |            | 2012      |            | 2013      |            | 2014       |            | Total Across Years |            |
|                                                                         | N                        | %          | N         | %          | N         | %          | N         | %          | N          | %          | N                  | %          |
| A Lot Better                                                            | 4                        | 13%        | 1         | 4%         | 4         | 14%        | 4         | 17%        | 2          | 6%         | 15                 | 11%        |
| Somewhat Better                                                         | 5                        | 17%        | 6         | 26%        | 9         | 32%        | 4         | 17%        | 10         | 31%        | 34                 | 25%        |
| A Little Better                                                         | 6                        | 20%        | 4         | 17%        | 6         | 21%        | 5         | 22%        | 12         | 38%        | 33                 | 24%        |
| <b>Better subtotal:</b>                                                 | <b>15</b>                | <b>50%</b> | <b>11</b> | <b>48%</b> | <b>19</b> | <b>68%</b> | <b>13</b> | <b>57%</b> | <b>24</b>  | <b>75%</b> | <b>82</b>          | <b>60%</b> |
| The Same                                                                | 13                       | 43%        | 8         | 35%        | 8         | 29%        | 6         | 26%        | 7          | 22%        | 42                 | 31%        |
| A little worse                                                          | 1                        | 3%         | 1         | 4%         | 0         | 0%         | 1         | 4%         | 0          | 0%         | 3                  | 2%         |
| Somewhat worse                                                          | 1                        | 3%         | 2         | 9%         | 1         | 4%         | 2         | 9%         | 1          | 3%         | 7                  | 5%         |
| A lot worse                                                             | 0                        | 0%         | 1         | 4%         | 0         | 0%         | 1         | 4%         | 0          | 0%         | 2                  | 1%         |
| <b>Same or Worse subtotal:</b>                                          | <b>15</b>                | <b>50%</b> | <b>12</b> | <b>52%</b> | <b>9</b>  | <b>32%</b> | <b>10</b> | <b>43%</b> | <b>8</b>   | <b>25%</b> | <b>54</b>          | <b>40%</b> |
| <b>Total:</b>                                                           | <b>30</b>                |            | <b>23</b> |            | <b>28</b> |            | <b>23</b> |            | <b>32</b>  |            | <b>136</b>         |            |
| <u><i>Total Across Sites</i></u>                                        | Attended PTM Level 3 in: |            |           |            |           |            |           |            |            |            | Total Across Years |            |
|                                                                         | 2010                     |            | 2011      |            | 2012      |            | 2013      |            | 2014       |            | Total Across Years |            |
|                                                                         | N                        | %          | N         | %          | N         | %          | N         | %          | N          | %          | N                  | %          |
| A Lot Better                                                            | 11                       | 13%        | 8         | 12%        | 9         | 15%        | 11        | 14%        | 12         | 10%        | 51                 | 12%        |
| Somewhat Better                                                         | 14                       | 16%        | 14        | 22%        | 21        | 34%        | 18        | 23%        | 35         | 29%        | 102                | 25%        |
| A Little Better                                                         | 22                       | 25%        | 16        | 25%        | 13        | 21%        | 20        | 25%        | 42         | 35%        | 113                | 27%        |
| <b>Better subtotal:</b>                                                 | <b>47</b>                | <b>53%</b> | <b>38</b> | <b>58%</b> | <b>43</b> | <b>69%</b> | <b>49</b> | <b>62%</b> | <b>89</b>  | <b>74%</b> | <b>266</b>         | <b>64%</b> |
| The Same                                                                | 31                       | 35%        | 19        | 29%        | 16        | 26%        | 24        | 30%        | 24         | 20%        | 114                | 27%        |
| A little worse                                                          | 4                        | 5%         | 2         | 3%         | 0         | 0%         | 2         | 3%         | 2          | 2%         | 10                 | 2%         |
| Somewhat worse                                                          | 5                        | 6%         | 2         | 3%         | 3         | 5%         | 2         | 3%         | 4          | 3%         | 16                 | 4%         |
| A lot worse                                                             | 1                        | 1%         | 4         | 6%         | 0         | 0%         | 2         | 3%         | 2          | 2%         | 9                  | 2%         |
| <b>Same or Worse subtotal:</b>                                          | <b>41</b>                | <b>47%</b> | <b>27</b> | <b>42%</b> | <b>19</b> | <b>31%</b> | <b>30</b> | <b>38%</b> | <b>32</b>  | <b>26%</b> | <b>149</b>         | <b>36%</b> |
| <b>Total:</b>                                                           | <b>88</b>                |            | <b>65</b> |            | <b>62</b> |            | <b>79</b> |            | <b>121</b> |            | <b>415</b>         |            |
